# Supplementary material
Source: Springer Nature journal article supplement (https://www.springermedizin.de/resource/supplementary/13075_2012_3634_MOESM5_ESM.pdf/9694998)

# TLR9/CPG

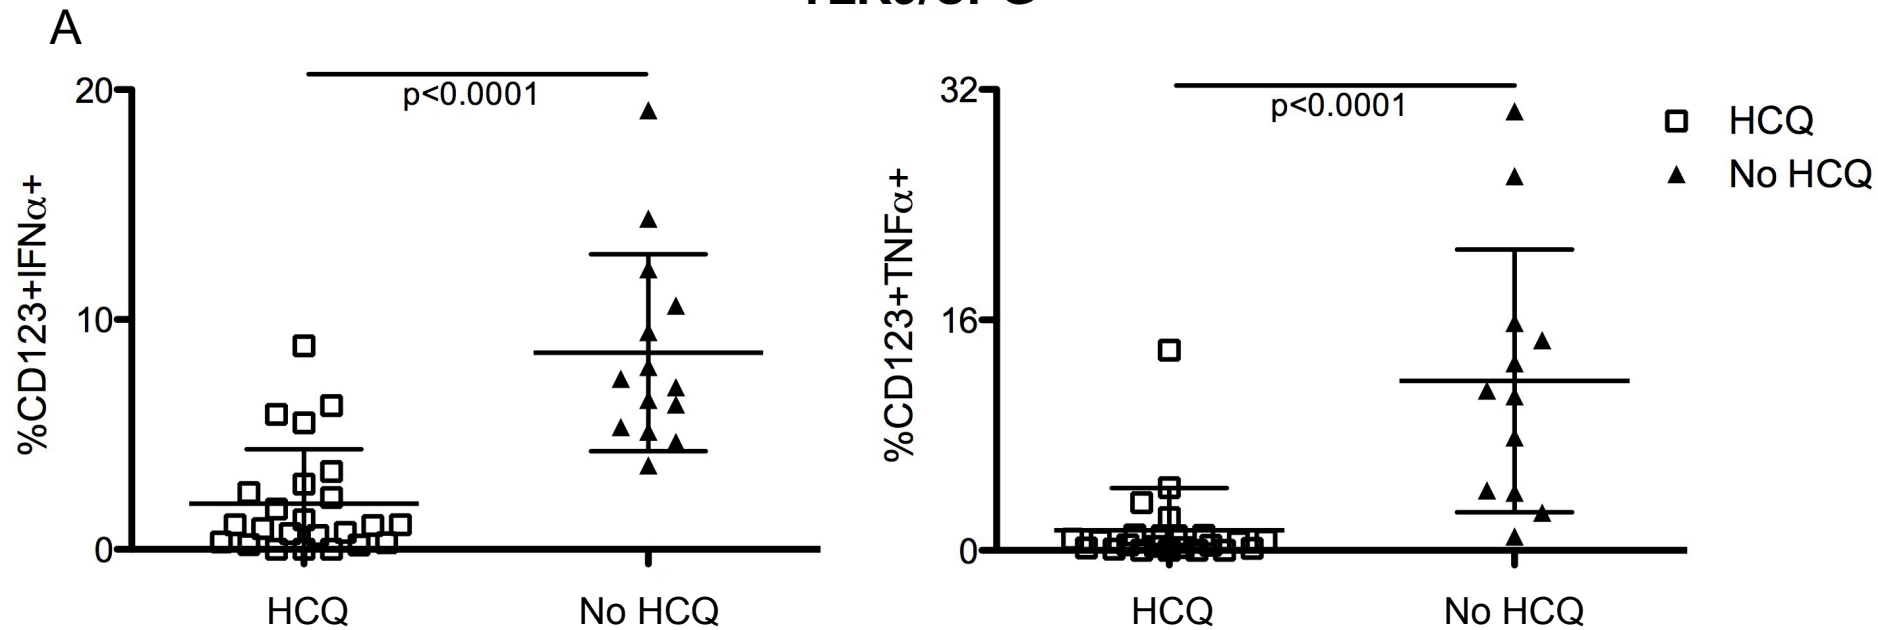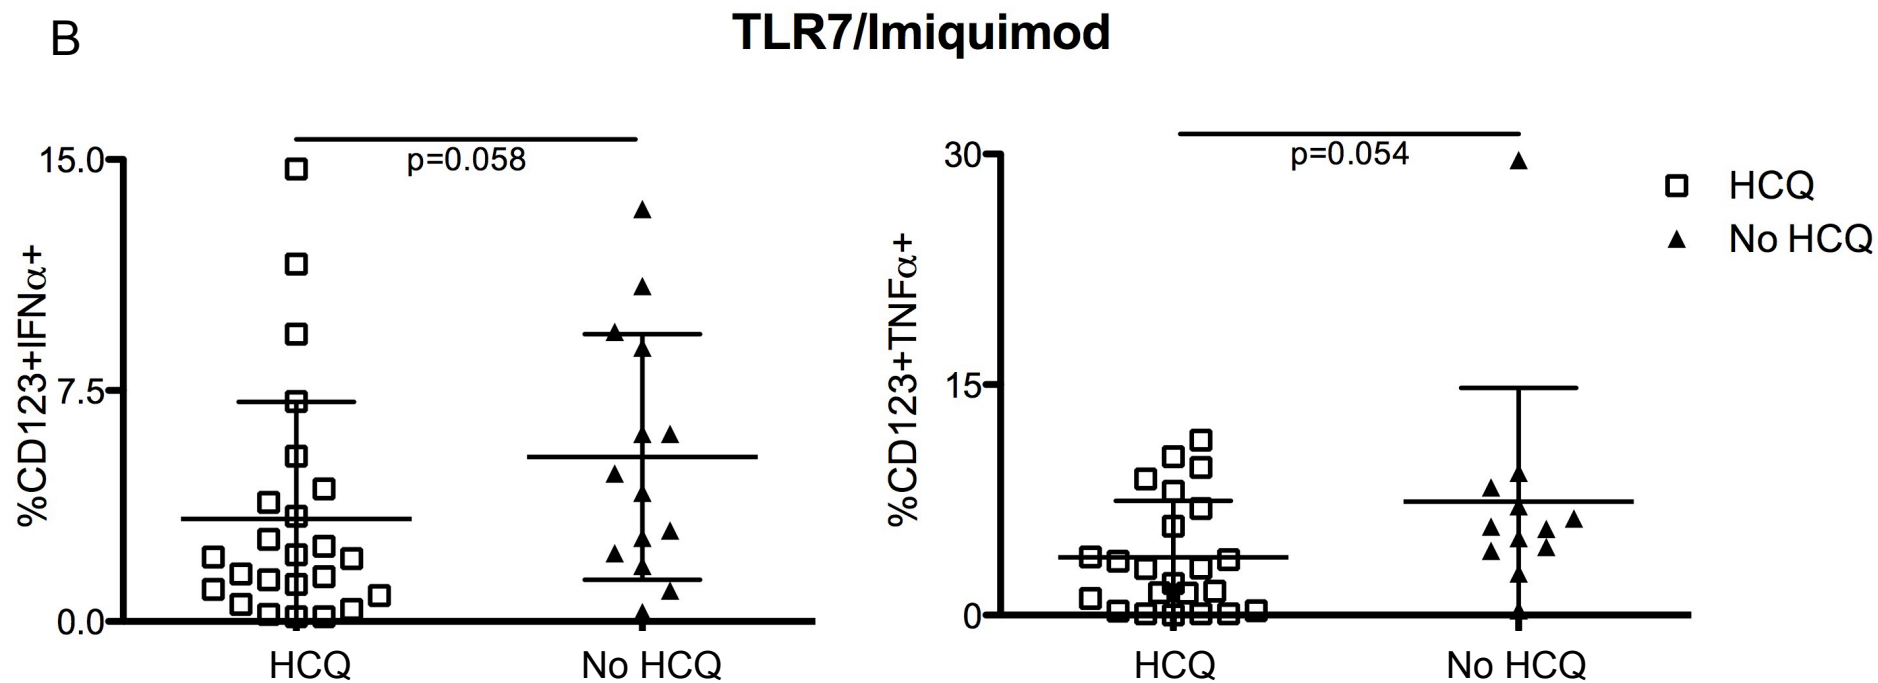

Supplement: MOESM5 [file 9694998]
